# Supplementary material for: Muscone improves hypoxia/reoxygenation (H/R)-induced neuronal injury by blocking HMGB1/TLR4/NF-κB pathway via modulating microRNA-142
Source: PeerJ journal article supplement (doi:10.7717/peerj.13523), 2022-07-15

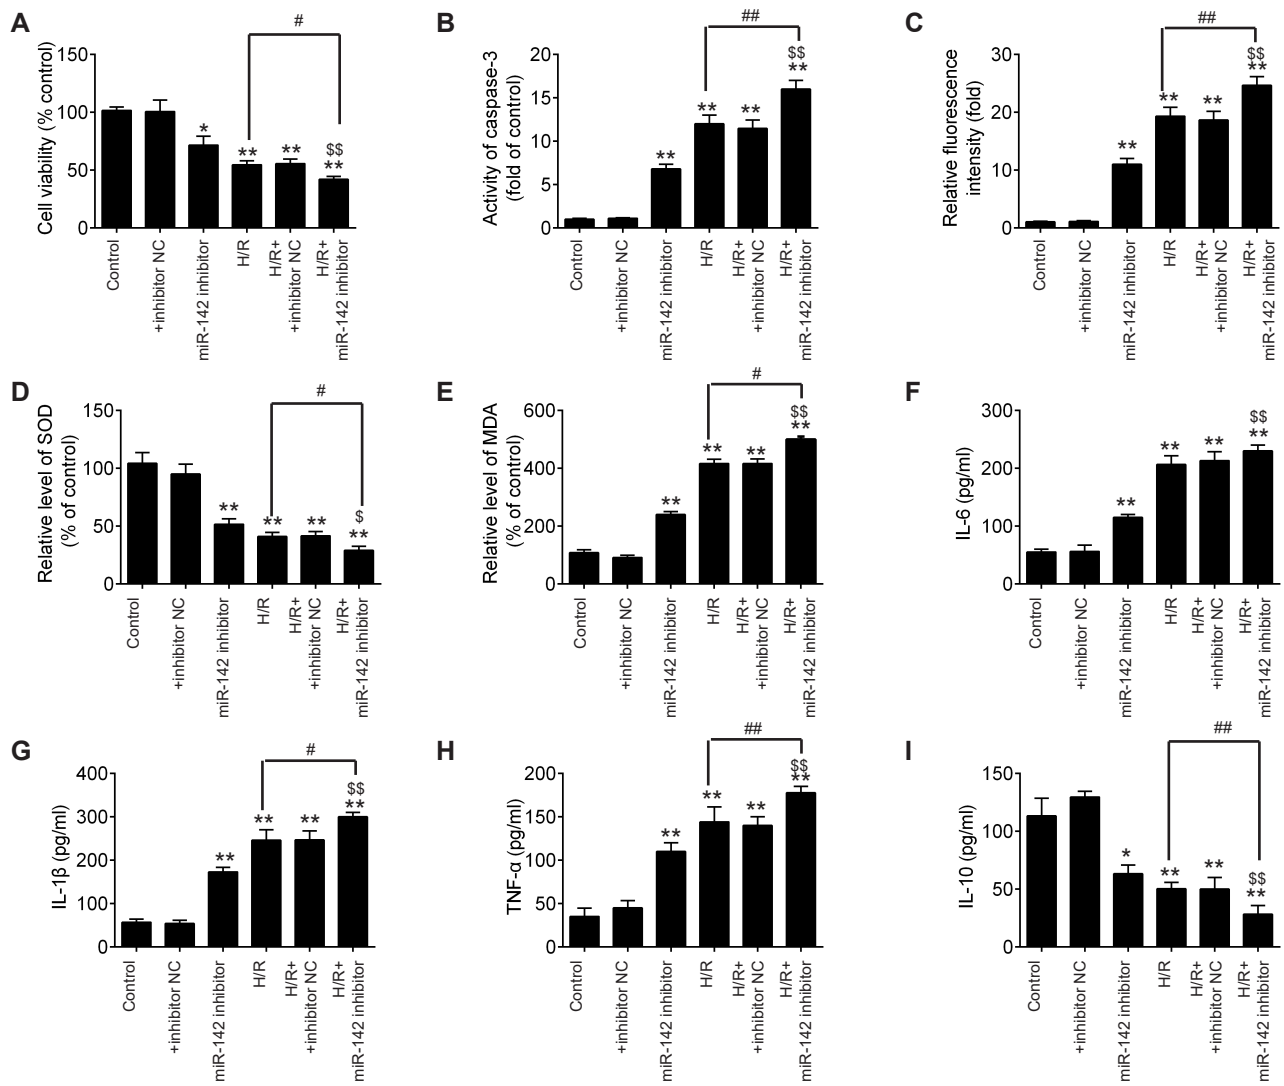

Supplement: Suppl_figure_2.pdf [file Suppl_figure_2.pdf]
